# Supplementary material
Source: PubMed Central journal article supplement (PMC1201377)
Supplement: nar_33_16_e138__1.pdf [file nar_33_16_e138__1.pdf]

**Thermal Difference Spectra:  
A specific signature for nucleic acid structures**

**Jean-Louis Mergny<sup>1\*</sup>, Jing Li<sup>2</sup>, Laurent Lacroix<sup>1</sup>, Samir Amrane<sup>1</sup> &  
Jonathan B. Chaires<sup>3</sup>**

***SUPPLEMENTARY MATERIAL***

## SUPPLEMENTARY FIGURES

**Supplementary Figure S1. Raw (S4A, left) and Normalized (S4B, right) TDS of the i-DNA forming  $(C_5TA_2)_3C_5$  sequence (1)** using various upper temperatures (indicated in the figure). Experiment performed in a pH 7.2 10 mM sodium cacodylate buffer. (Absorbance recorded while cooling the sample; a hysteresis is present, even with a 0.2°C/min temperature gradient).

**Supplementary Figure S2: Normalized differential absorbance signatures.**

*A. DNA self-complementary duplexes, 100% AT:*

ATATATATATATATAT (dark red) AATTAATTAATTAATT (orange)  
AAATTTAATTAATTT (yellow) AAAATTTTAAAATTTT (green)  
AATTTTTTAAAAAATT (light blue) TTTTTTTTAAAAAAA (dark blue)  
AAAAAAAAATTTTTTTTT (purple); Poly d(A-T) (black). Samples at pH 7.2, 0.1M KCl.

*B. DNA self-complementary duplexes 100% GC:*

CGCGGGCCCGCG (dark red) CGCGCGCGCGCG (red) CCGGCCGGCCGG (orange)  
CCCGGGCCCGGG (yellow) CCGGGGCCCGG (green) CGGGGGCCCCCG (light blue)  
GGGGGGCCCCC (dark blue) GGCGCGCGCGCC (purple) CCGGGGCCCGG (black).  
Samples at pH 7.2, 0.1M KCl (poly d(G-C) has a  $T_m$  above 95°C under these conditions, and could not be compared with oligonucleotides).

*C. Z-DNA (2-4)*

CGCGCGCGCGCG in 4M KCl (red) or 3M KCl (blue). CGCGCGCGCGCG in 4M NaCl (orange) MGMGMGMGMGMG (where M= 5methyl Cytosine) in 4M NaCl (green).

*D. Parallel stranded DNA (5-8)*

5'-AAAAAAAAAATAATTTTAAATATT + 5'-TTTTTTTTTTTATTAAAATTTATAA (red)

5'-TTATAAATTTTAATAAAAAAAAAA + 5'-AATATTTAAAATTATTTTTTTTTT

(orange)

5'-ATTAAATTTTAAAAATTTTTT + 5'-TAATTTAAAATTTTAAAAAA (green)

5'-TTTTTATTAAATATA + 5'-AAAAATAATTTATAT (blue)

5'-ATATAAATTATTTTT + 5'-TATATTTAATAAAAA (purple)

Samples at pH 7.2, 0.10-0.13M KCl with or without 10 mM MgCl<sub>2</sub>.

*E. GA DNA duplexes (9-12)*

d-(GA)<sub>12</sub> (red) d-(GA)<sub>15</sub> (green) and d-(GA)<sub>18</sub> (blue). Samples at pH 7.0, 0.18M NaCl.

*F. Hoogsteen DNA duplexes (13,14)*

5' AGAAAGGAGAAGAA + 5' TCTTTCCTCTTCTT at pH 5 (red) or 5.5 (orange)(13)

5' GAAGGAAGAGAGAAAGGAGG 3' CTCCTTCTCTCTTTCCTCC at pH 5 (light blue)

or 5.5 (dark blue)

Samples in 0.1M KCl

*G. i-DNA (15,16)*

CCCTAACCTAACCTAACCT (17,18)(dark red) CCCTAACCC (red)

CCCCAACCCCAACCCCAACCC (orange) TCCCTCCTTTTTTTCCCTCCT (yellow)

TCCTCCTTTTCCTCCT (19)(green) CCTTTCCTTTACCTTTCC (20)(dark green)

CCTTGCCTTTACCTTCCC (light blue) CCCCTTCCCCTTCCCCTTCCCC (dark blue)  
TCCCCTTTCCCCTTTCCCCTTTCCCC (purple) CTCCTTTTCCTCC (19)(black)  
CCCTCCCTCCCTCCCTTTTTTTTT (grey) poly dC (black, dotted line)

Samples in 10 mM sodium cacodylate at pH 6.0 or 6.4.

*H. Pyrimidine triplexes (21,22)*

TCTCTCTCCCCTTCCCTCTCTCT + GGAGAGAGA (dark red)(23)  
TCTCTCTTCCCTTCTTCTCTCT + 5' GAAGAGAGGAG (red)(23)  
3' A G C T C C A G A A A G A A A A A G A A A A T C C C C C +  
5'TCGAGGTCTTTTCTTTTTTCTTTTAGGGGG + 3'TCTTTTCTTTTTTCTTTT  
(orange)(23)

3'-GAAAGAGAGGAGG 5' + 5'-CTTTCTCTCCTCC + 3')-CTTTCTCTCCTCC (yellow)

dA<sub>18</sub> + 2. dT<sub>18</sub> (green) (24)

GAGAGAGAAACCCCTTTCTCTCTCTTTTCTCTCTCTTT (light blue) (25)

5' - C G A G T T A A G A A G A A A A A G A T T G A G C + 3' -  
GCTCAATTCTTCTTTTTTCTAACTCG + 5'-TTCTTCTTTTTTCT (dark blue)

5'-CTCCTCTCTTCCCTTCTTCTCTCCTC + 5'-GAAGAGAGGAG (purple)

All spectra correspond to triplex to duplex+single strands transitions (hence, the "high" temperature spectra must be recorded below the T<sub>m</sub> of the corresponding duplex). One may notice that the different sequences give rise to relatively distinct spectra (the 8 other panels are more homogenous). This difference is explained in large part by the different base content of the triplexes: for example, a negative signal around 295 nm is only observed when a significant number of cytosines are present in the third strand. The two base triplets involved in pyrimidine triplexes (T.A\*T and C.G\*C+) have different TDS signatures. One should also note that these TDS correspond only to the melting of the third strand, with no disruption of

the oligopurine-oligopyrimidine duplex; a direct triplex to single strands transition would give a different TDS (data not shown).

#### I. *DNA G-quadruplexes in Na<sup>+</sup>*

TAGGGUTAGGGT (26)(dark red) UAGGGTBAGGGT (26)(red) GGTTGGTGTGGTTGG (27,28)(orange) (GGGGTTTT)<sub>3</sub>GGGG (29)(yellow) (GGGGTT)<sub>3</sub>GGGG (30)(green) A(GGGTTA)<sub>3</sub>GGG (dark green)(31) (GGGTTA)<sub>3</sub>GGG (32)(light blue) A(GGGGTTA)<sub>3</sub>GGGG (dark blue) A(GGGGGTTA)<sub>3</sub>GGGGG (purple) A(GGTTA)<sub>3</sub>GG (black). All samples at pH 7.0 or 7.2 in 0.1 M NaCl. U and B correspond to deoxyuracil and bromo-deoxyuracil, respectively (26).

Polynucleotides appear as dotted lines, oligonucleotides as solid lines. Except where indicated, sequences are provided in the 5'-> 3' direction, and correspond to oligodeoxynucleotides.

**Supplementary Figure S3. Circular dichroic spectra of the human telomeric repeat sequence 5'AGGG(TTAG<sub>3</sub>)<sub>3</sub> in 200 mM NaCl (blue) or KCl (red).**

Molar ellipticity [ $\epsilon$ ] is shown.

**Supplementary Figure S4. Normalized TDS of the human telomeric repeat sequence 5'AGGG(TTAG<sub>3</sub>)<sub>3</sub> in NaCl (blue) or KCl (green) (average value  $\pm$  S.D. at each wavelength)**

## REFERENCES:

1. Mergny, J.L. and Lacroix, L. (1998) Kinetics and Thermodynamics of i-DNA Formation: Phosphodiester vs. modified Oligodeoxynucleotides. *Nucleic Acids Res.*, **26**, 4797-4803.
2. Wang, A.H.J., Quigley, G.J., Kolpak, F.J., Crawford, J.L., Van Boom, J.H., Van der Marel, G. and Rich, A. (1979) Molecular structure of a left-handed double helical fragment at atomic resolution. *Nature*, **282**, 680-686.
3. Ban, C., Ramakrishnan, B. and Sundaralingam, M. (1996) Crystal structure of the self-complementary 5'-purine start decamer d(GCGCGCGCGC) in the Z-DNA conformation .1. *Biophys. J.*, **71**, 1215-1221.
4. Rich, A. and Zhang, S.G. (2003) Z-DNA: the long road to biological function. *Nat. Rev. Genet.*, **4**, 566-572.
5. van de Sande, J.H., Ramsing, N.B., Germann, M.W., Elhorst, W., Kalisch, B.W., von Kitzing, E., Pon, R.T., Clegg, R.C. and Jovin, T.M. (1988) Parallel stranded DNA. *Science*, **241**, 551-557.
6. Ramsing, N.B. and Jovin, T.M. (1988) Parallel stranded duplex DNA. *Nucleic Acids Res.*, **16**, 6659-6676.
7. Rippe, K. and Jovin, T.M. (1989) Substrate properties of 25-nt parallel-stranded linear duplexes. *Biochemistry*, **28**, 9542-9549.
8. Rippe, K., Ramsing, N.B. and Jovin, T.M. (1989) Spectroscopic properties and helical stabilities of 25-nt parallel-stranded linear DNA duplexes. *Biochemistry*, **28**, 9536-9541.
9. Shiber, M.C., Braswell, E.H., Klump, H. and Fresco, J.R. (1996) Duplex-tetraplex equilibrium between a hairpin and two interacting hairpins of d(A-G)(10) at neutral pH. *Nucleic Acids Res.*, **24**, 5004-5012.
10. Ortiz-Lombardia, M., Jimenez-Garcia, E., Garcia-Bassets, I. and Azorin, F. (1998) Interaction of zinc(II) ions with antiparallel-stranded d(GA)(n) DNA homoduplexes. *J. Biomol. Struct. Dyn.*, **16**, 243-251.
11. Huertas, D., Bellolell, L., Casasnovas, J.M., Coll, M. and Azorin, F. (1993) Alternating d(GA)(n) DNA Sequences Form Antiparallel Stranded Homoduplexes Stabilized by the Formation of G.A Base Pairs. *EMBO J*, **12**, 4029-4038.
12. Rippe, K., Fritsch, V., Westhof, E. and Jovin, T.M. (1992) Alternating d(G-A) Sequences Form a Parallel-Stranded DNA Homoduplex. *EMBO J.*, **11**, 3777-3786.
13. Escudé, C., Mohammadi, S., Sun, J.S., Nguyen, C.H., Bisagni, E., Liquier, J., Taillandier, E., Garestier, T. and Hélène, C. (1996) Ligand-induced formation of Hoogsteen-paired parallel DNA. *Chem. Biol.*, **3**, 57-65.
14. Raghunathan, G., Miles, H.T. and Sasisekharan, V. (1994) Parallel nucleic acid helices with Hoogsteen base pairing: Symmetry and structure. *Biopolymers*, **34**, 1573-1581.
15. Leroy, J.L., Gehring, K., Kettani, A. and Guéron, M. (1993) Acid Multimers of oligodeoxycytidine strands: stoichiometry, base pair characterization and proton exchange properties. *Biochemistry*, **32**, 6019-6031.
16. Gehring, K., Leroy, J.L. and Guéron, M. (1993) A tetrameric structure with protonated cytosine-cytosine base pairs. *Nature*, **363**, 561-565.
17. Phan, A.T., Gueron, M. and Leroy, J.L. (2000) The solution structure and internal motions of a fragment of the cytidine-rich strand of the human telomere. *J. Mol. Biol.*, **299**, 123-144.

18. Leroy, J.L., Guéron, M., Mergny, J.L. and Hélène, C. (1994) Intramolecular folding of a fragment of the cytosine-rich strand of telomeric DNA into an i-motif. *Nucleic Acids Res.*, **22**, 1600-1606.
19. Mergny, J.L., Lacroix, L., Han, X., Leroy, J.L. and Hélène, C. (1995) Intramolecular folding of pyrimidine oligodeoxynucleotides into an i-DNA motif. *J. Am. Chem. Soc.*, **117**, 8887-8898.
20. Han, X., Leroy, J.L. and Guéron, M. (1998) An intramolecular i-motif: the solution structure and base pair opening kinetics of d(5mCCTTTCCTTTACCTTCC). *J. Mol. Biol.*, **278**, 949-965.
21. Le Doan, T., Perrouault, L., Praseuth, D., Habhoub, N., Decout, J.-L., Thuong, N.T., Lhomme, J. and Hélène, C. (1987) Sequence specific recognition, photocrosslinking and cleavage of the DNA double helix by an oligo  $\alpha$  thymidylate covalently linked to an azidoproflavine derivative. *Nucleic Acids Res.*, **15**, 7749-7760.
22. Moser, H.E. and Dervan, P.B. (1987) Sequence specific cleavage of double helical DNA by triple helix formation. *Science*, **238**, 645-650.
23. Mills, M., Arimondo, P., Lacroix, L., Garestier, T., Hélène, C., Klump, H.H. and Mergny, J.L. (1999) Energetics of strand displacement reactions in triple helices: a spectroscopic study. *J. Mol. Biol.*, **291**, 1035-1054.
24. Haq, I., Ladbury, J.E., Chowdhry, B.Z. and Jenkins, T.C. (1996) Molecular anchoring of duplex and triplex DNA by disubstituted anthracene-9,10-diones: Calorimetric, UV melting, and competition dialysis studies. *J. Am. Chem. Soc.*, **118**, 10693-10701.
25. Völker, J., Botes, D.P., Lindsey, G.G. and Klump, H.H. (1993) Energetics of a stable intramolecular DNA triple helix formation. *J. Mol. Biol.*, **230**, 1278-1290.
26. Phan, A.T. and Patel, D.J. (2003) Two-repeat human telomeric d(TAGGGTTAGGGT) sequence forms interconverting parallel and antiparallel G-quadruplexes in solution: Distinct topologies, thermodynamic properties, and folding/unfolding kinetics. *J. Am. Chem. Soc.*, **125**, 15021-15027.
27. Kelly, J.A., Feigon, J. and Yeates, T.O. (1996) Reconciliation of the X-ray and NMR structures of the thrombin-binding aptamer d(GGTTGGTGTGGTTGG). *J. Mol. Biol.*, **256**, 417-422.
28. Schultze, P., Macaya, R.F. and Feigon, J. (1994) 3-Dimensional Solution Structure of the Thrombin-Binding DNA Aptamer d(GGTTGGTGTGGTTGG). *J Mol Biol*, **235**, 1532-1547.
29. Balagurumoorthy, P. and Brahmachari, S.K. (1995) Intra- and interloop interactions in the folded G quartet structure of Oxytricha telomeric sequence. *Indian J Biochem Biophys*, **32**, 385-390.
30. Wang, Y. and Patel, D.J. (1994) Solution structure of the Tetrahymena telomeric repeat d(T(2)G(4))(4) G-tetraplex. *Structure*, **2**, 1141-1156.
31. Wang, Y. and Patel, D.J. (1993) Solution Structure of the Human Telomeric Repeat d[AG3(T2AG3)3] G-Tetraplex. *Structure*, **1**, 263-282.
32. Mergny, J.L., Phan, A.T. and Lacroix, L. (1998) Following G-quartet formation by UV-spectroscopy. *FEBS Lett.*, **435**, 74-78.

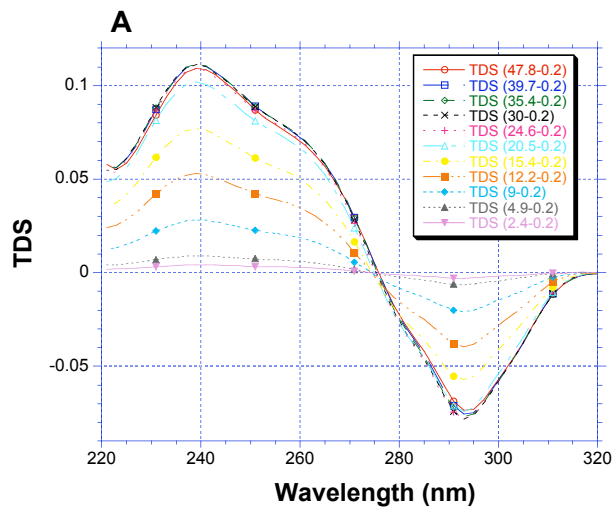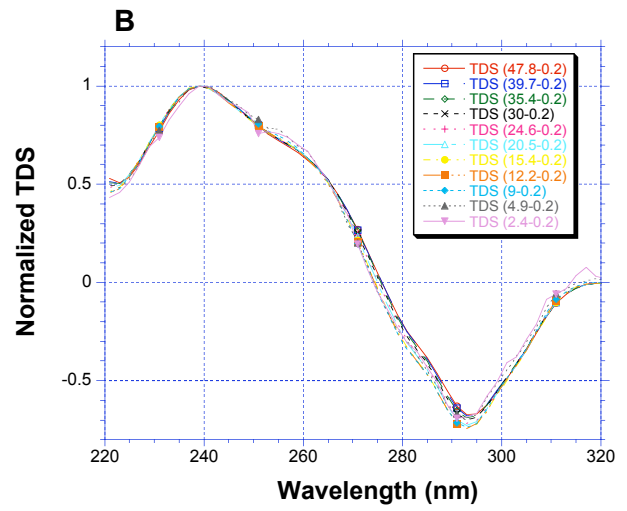

Supplementary Figure 1



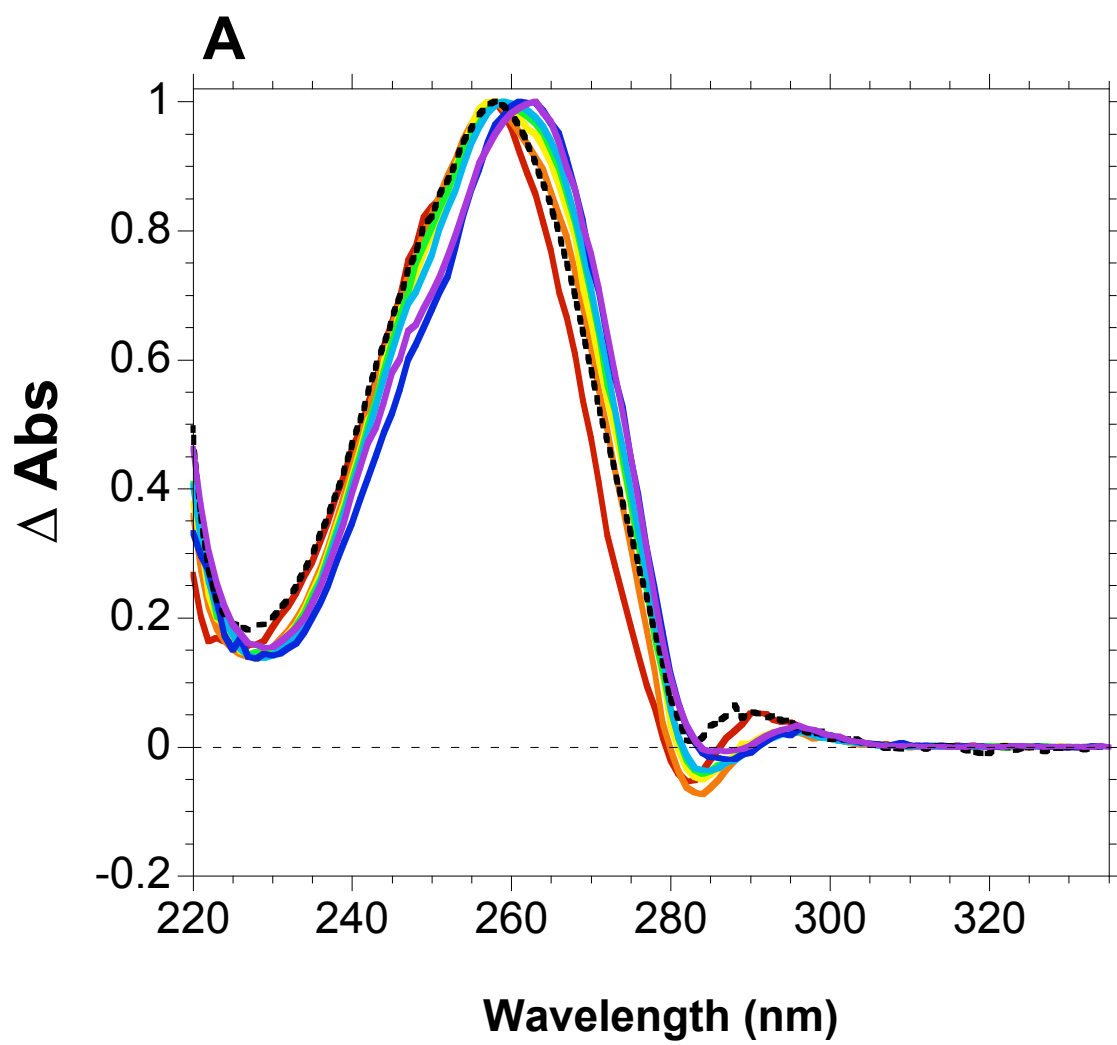

Supplementary Figure S2A

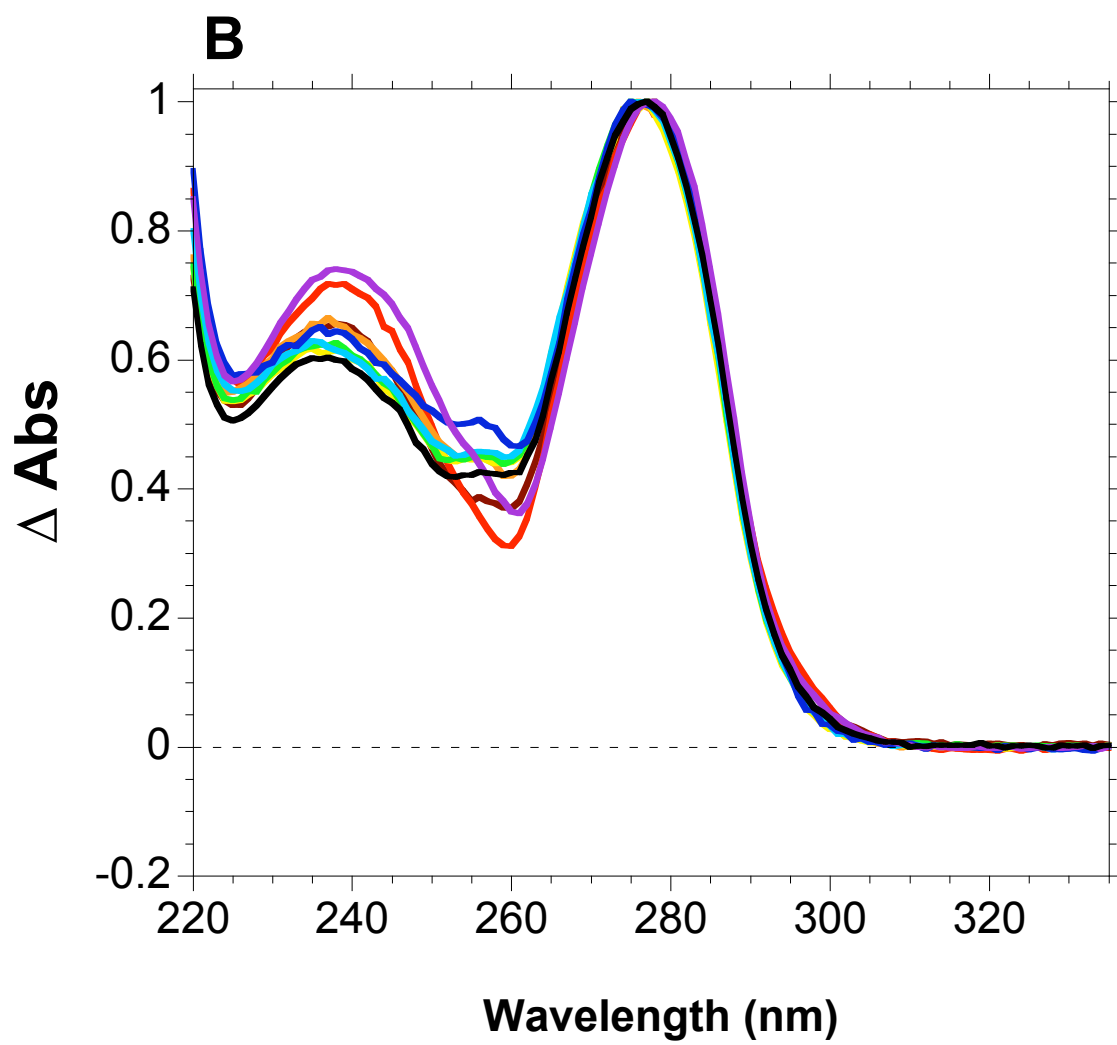

Supplementary Figure S2B

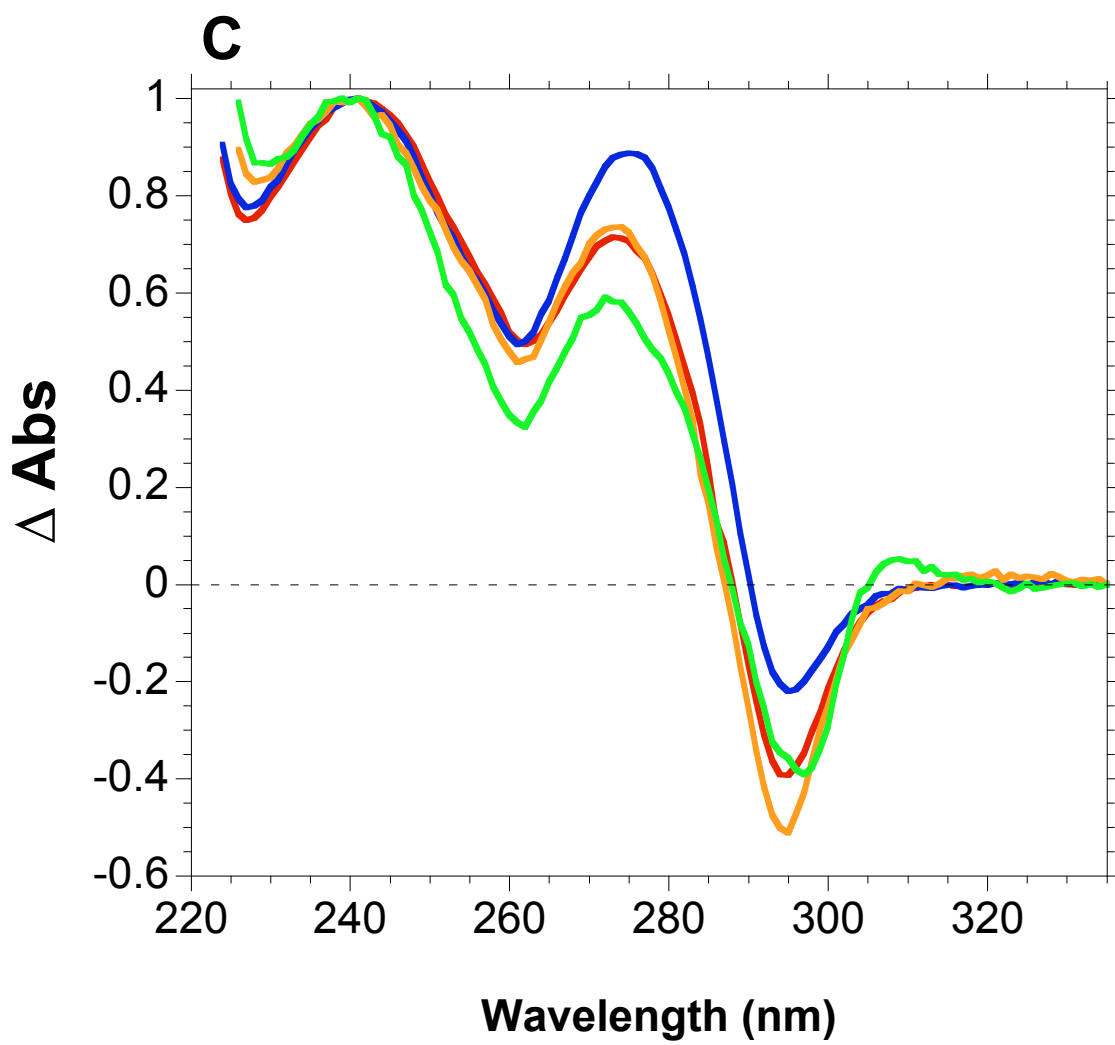

Supplementary Figure S2C

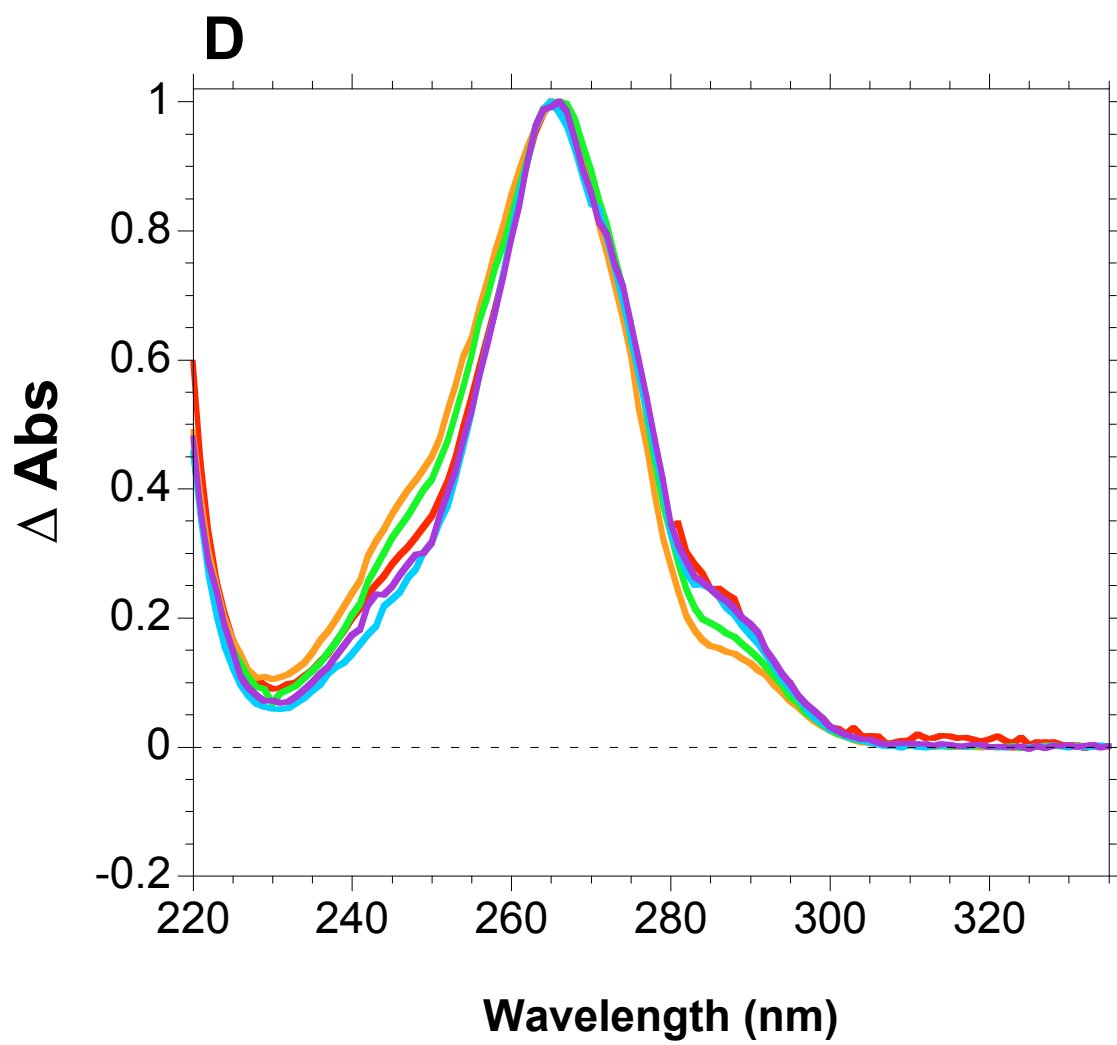

Supplementary Figure S2D

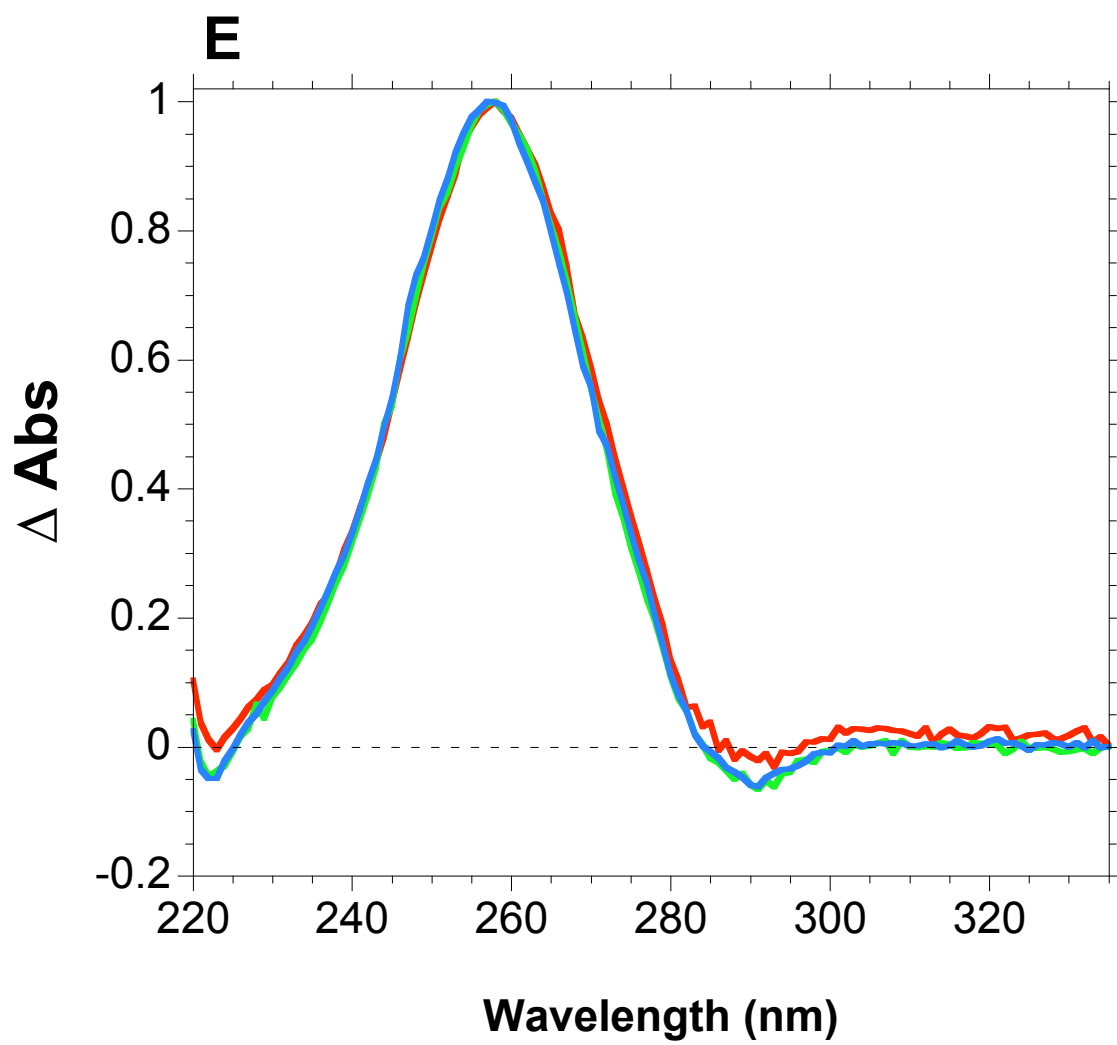

Supplementary Figure S2E

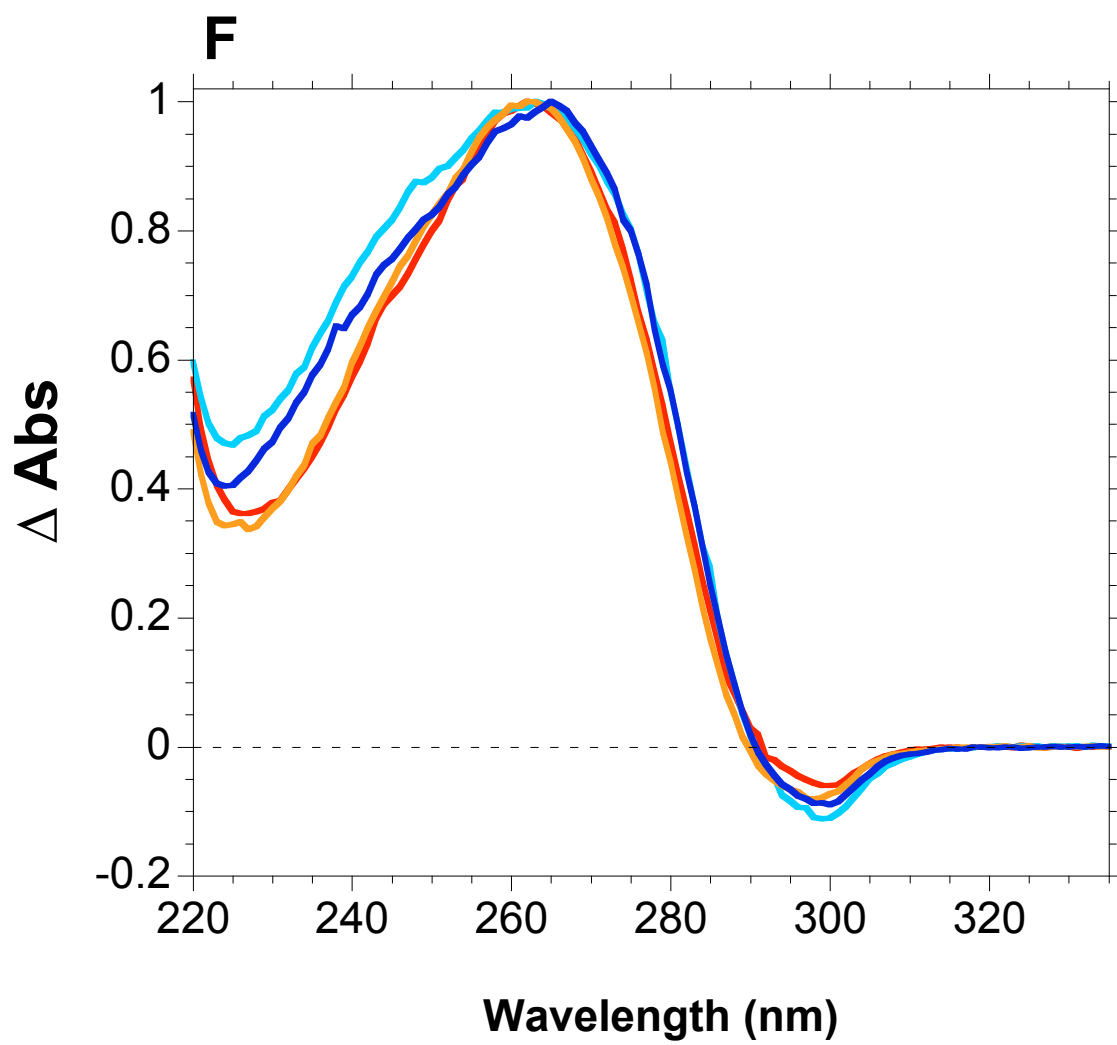

Supplementary Figure S2F

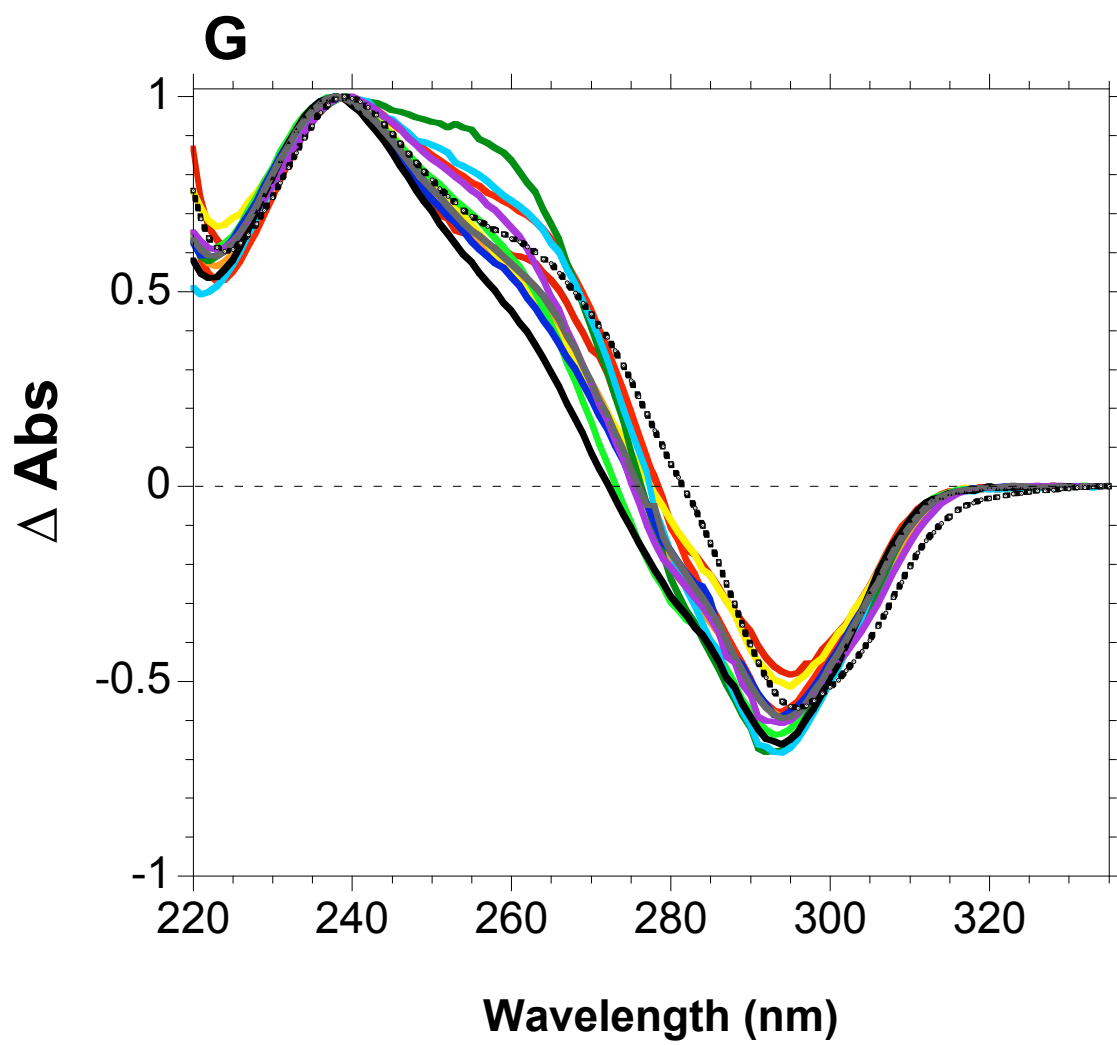

Supplementary Figure S2G

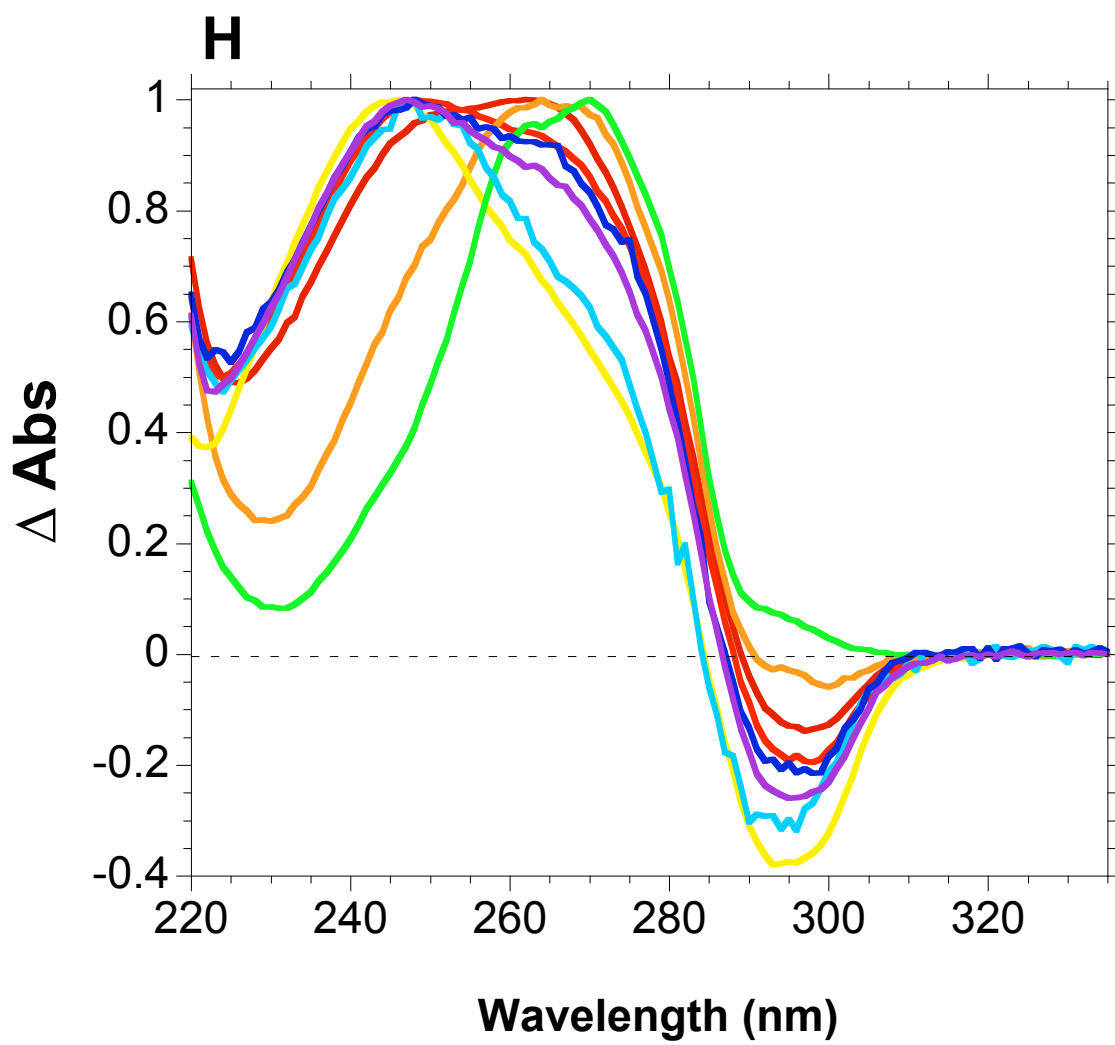

Supplementary Figure S2H



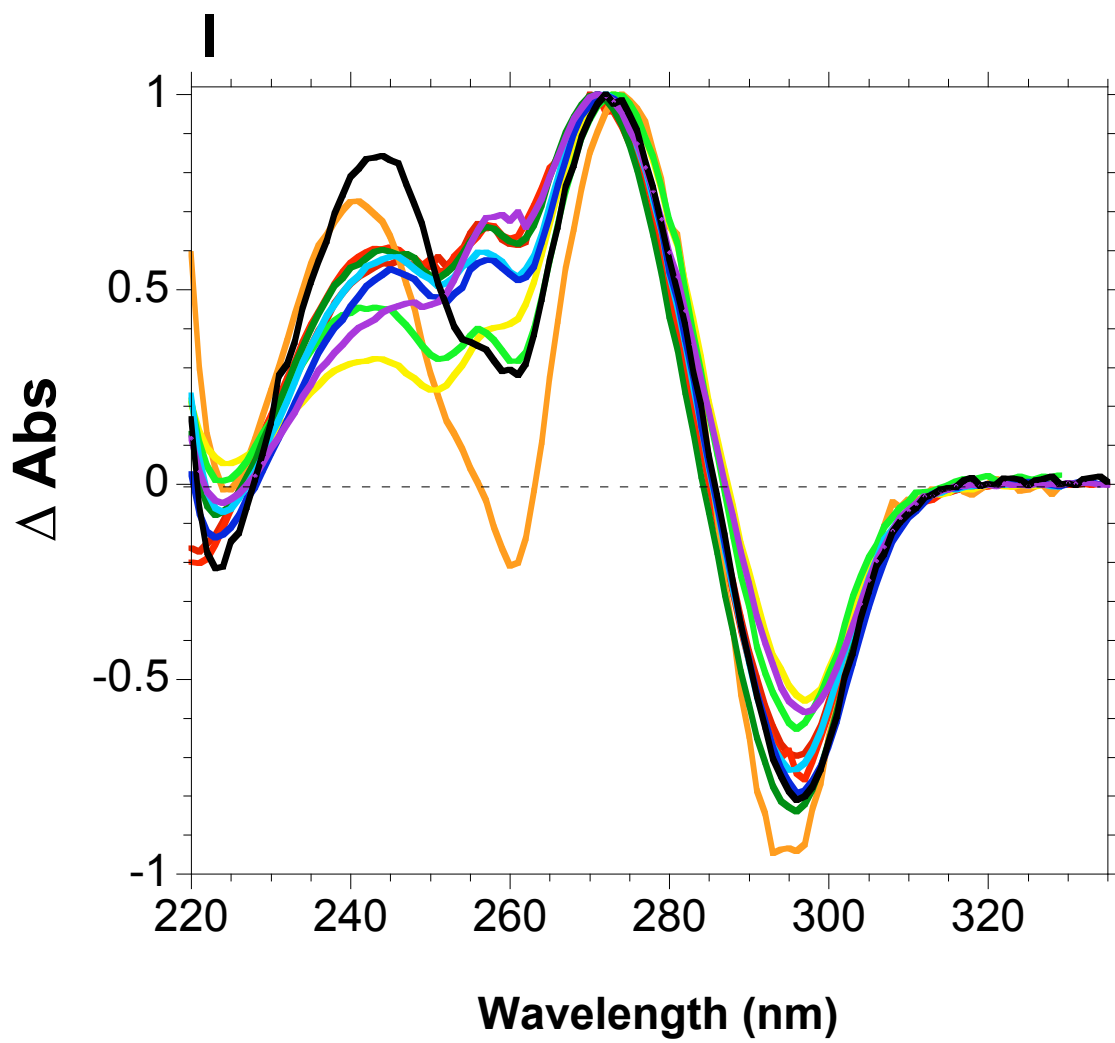

Supplementary Figure S2I

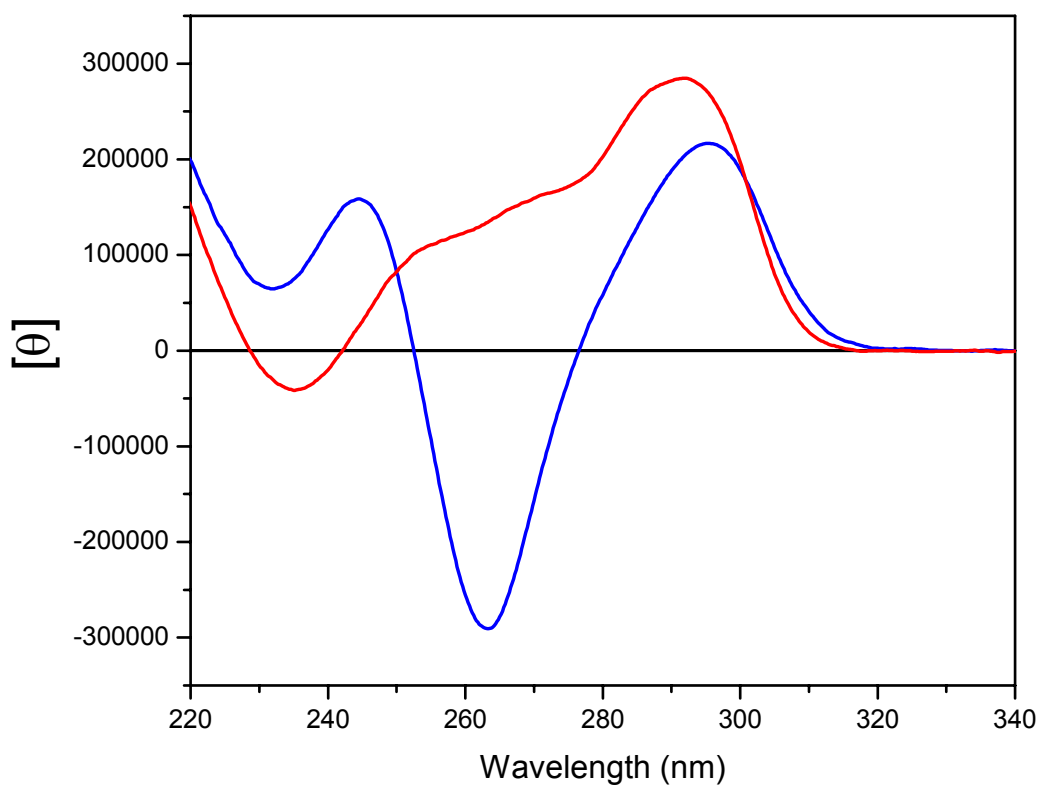

**Supplementary Figure S3.** Circular dichroic spectra of the human telomeric repeat sequence 5'AGGG(TTAG<sub>3</sub>)<sub>3</sub> in 200 mM NaCl (blue) or KCl (red). Molar ellipticity [Θ] is shown.

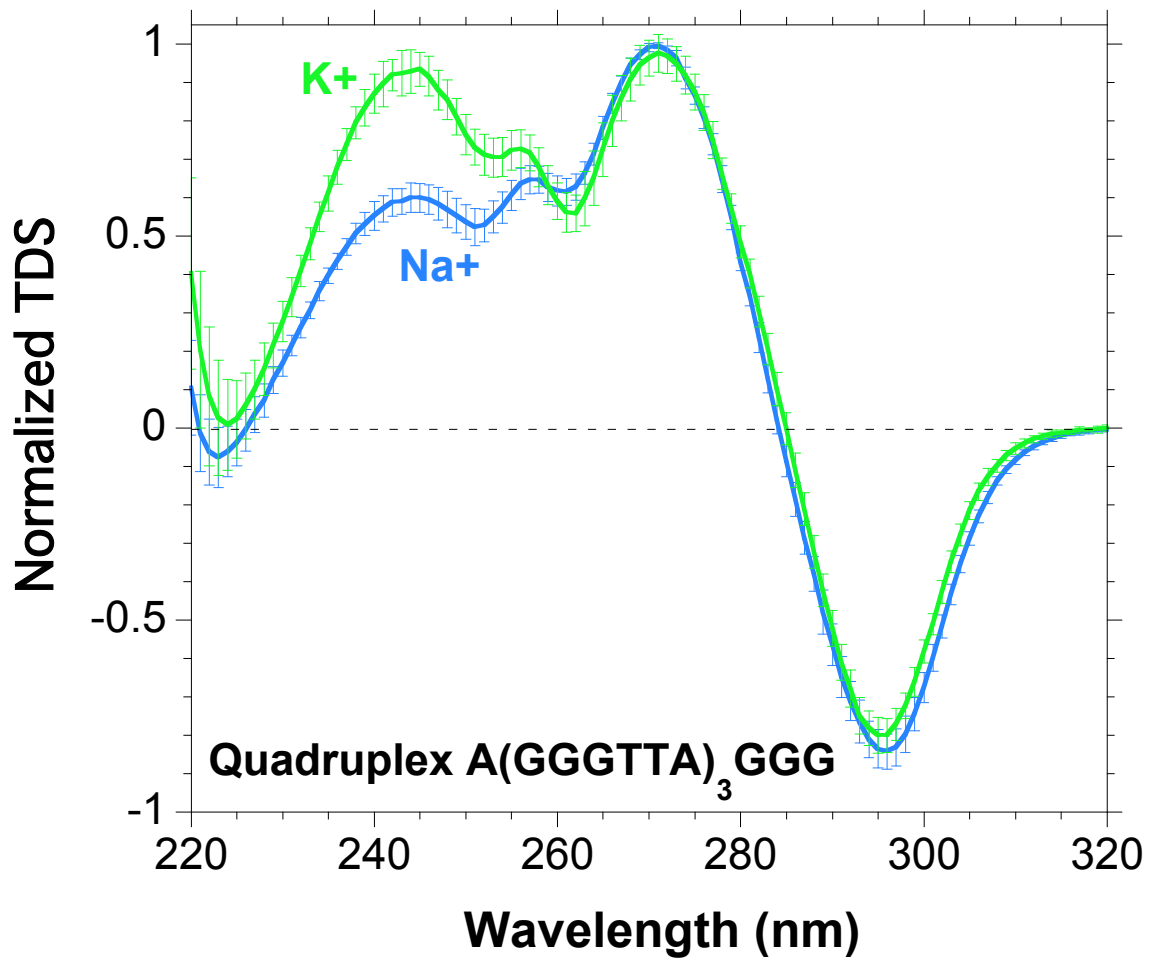

Supplementary Figure S4
